# Supplementary material for: M1 Muscarinic Receptor Deficiency Attenuates Azoxymethane-Induced Chronic Liver Injury in Mice
Source: PubMed Central journal article supplement (PMC4571652; doi:10.1038/srep14110), 2015-09-16
Supplement: srep14110-s1.pdf [file srep14110-s1.pdf]

**Title: M1 Muscarinic Receptor Deficiency Attenuates Azoxymethane-Induced Chronic Liver Injury in Mice**

**Authors:** Vikrant Rachakonda<sup>1</sup>, Ravirajsinh N. Jadeja<sup>2</sup>, Nathalie H. Urrunaga<sup>1</sup>, Nirish Shah<sup>1</sup>, Daniel Ahmad<sup>1</sup>, Kunrong Cheng<sup>1</sup>, William S. Twaddell<sup>3</sup>, Jean-Pierre Raufman<sup>1</sup>, and Sandeep Khurana<sup>2\*</sup>.

**Affiliations:** <sup>1</sup>Division of Gastroenterology and Hepatology, University of Maryland School of Medicine, Baltimore, Maryland, 21201; <sup>2</sup>Section of Gastroenterology and Hepatology, Georgia Regents University, Augusta, GA 30912; <sup>3</sup>Department of Pathology, University of Maryland School of Medicine, Baltimore, Maryland, 21201.

**Correspondence:** Sandeep Khurana, M.B.B.S.  
Medical College of Georgia,  
Georgia Regents University,  
Digestive Health Center,  
Section of Gastroenterology and Hepatology,  
1120 15<sup>th</sup> Street, AD2226, Augusta, GA 30912  
Ph.: 706-446-4887, Fax: 706-721-0331  
E-mail: [skhurana@gru.edu](mailto:skhurana@gru.edu)

Am12 (H<sub>2</sub>O<sub>2</sub> Apoptosis)

cleaved caspase 3

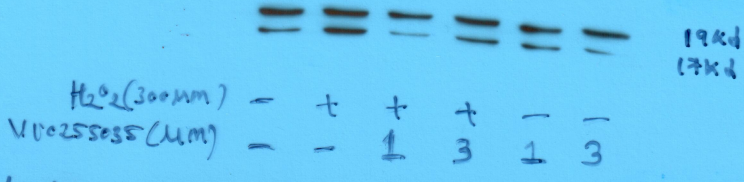

2/11/15

(3)

Am12 (H<sub>2</sub>O<sub>2</sub> Apoptosis)

BACTIN

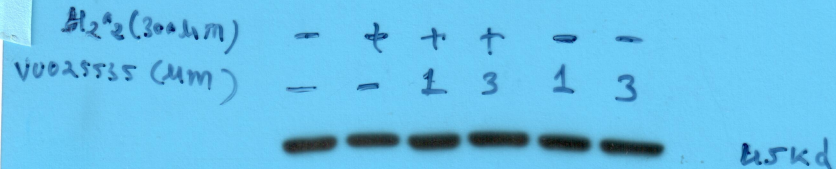

2/11/15

(2)
